# Supplementary material
Source: PubMed Central journal article supplement (PMC3363324)
Supplement: NIHMS366317-supplement-01.pdf [file NIHMS366317-supplement-01.pdf]

Supplement, Figure 1. Cellular uptake and metabolism of EGCG and quercetin under different treatments for 24 or 48 hours. PC-3 cells were treated with the indicated concentrations of EGCG and quercetin alone or in combination. Cellular contents were detected at 24 (A) or 48 (B) hours after treatment. The bars grouped by compounds with different superscript letters represent significant difference between treatments ( $P < 0.05$ ). Error bars represent standard deviation.

Supplement, Figure 2. Impact on COMT protein expression under different treatments for 2h. PC-3 cells (A) and LNCaP cells (B) were treated with the indicated concentrations of EGCG and quercetin alone or in combination for 2h. COMT protein expression was evaluated by Western blot. Error bars represent standard deviation.
